# Supplementary material for: Castor leaf mediated synthesis of iron nanoparticles for evaluating catalytic effects in transesterification of castor oil
Source: Royal Society of Chemistry journal article supplement (doi:10.1039/c5ra15186d), 2016-01-01
Supplement: c5ra15186d1.pdf [file c5ra15186d1.pdf]

## Electronic Supplementary Information

### Castor leaves mediated synthesis of iron nanoparticles for evaluating catalytic effects in transesterification of castor oil

Mookan Rengasamy,<sup>a</sup> Krishnasamy Anbalagan,<sup>b</sup> Shanmugam Kodhaiyolii<sup>b</sup> and Velan Pugalenti<sup>b\*</sup>

#### UV-visible Spectra:

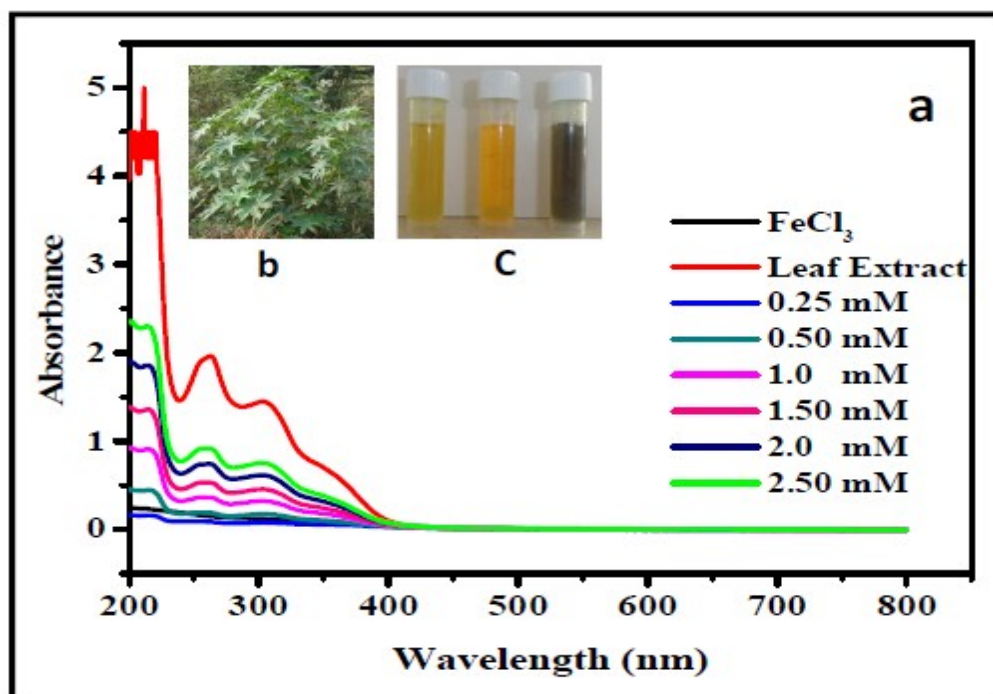

ESI Fig.1 (a) UV-visible absorption spectra of reaction mixture at different FeCl<sub>3</sub> concentrations; (b) Image of *Ricinus communis* leaf (inset) and (c) Visual observation of FeCl<sub>3</sub>, leaf extract and reaction mixture (inset)

#### TEM Images:

The TEM images given in Fig. 5 was analysed using TEM instruments made by Philips (Model: Tecnai 10, Netherlands). In order to confirm the TEM results, the freshly prepared iron nanoparticles were analysed using TEM instruments made by JEOL (Model No: JEOL 2100F, Japan). Similar type of images was obtained. The obtained TEM images are presented

in ESI Fig. 2. The TEM images show that the irregular shapes and agglomerates of the iron nanoparticles were evident. The formation of agglomerates may be due to the presence of biomolecules on the surface of the iron nanoparticles.

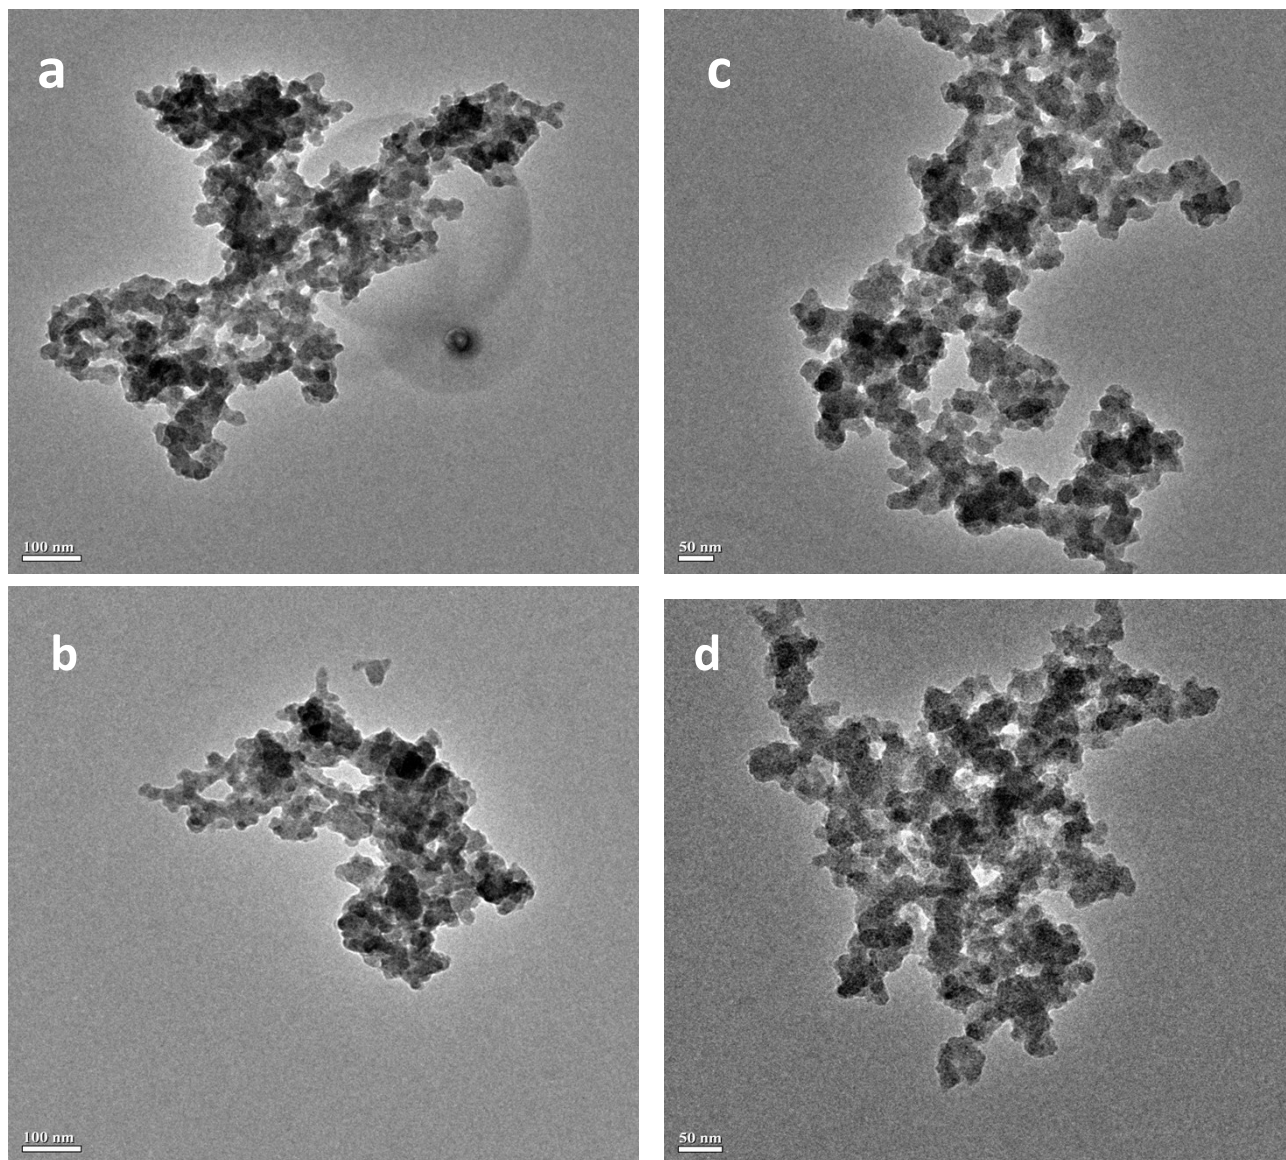

**ESI Fig. 2. TEM images of phytosynthesized iron nanoparticles at different scales:  
(a) & (b) 100 nm, (c) & (d) 50nm.**

**ESI Table 1. GC-MS profile for castor biodiesel**

| <b>Pk#</b> | <b>RT</b> | <b>Area%</b> | <b>Library/ID</b>                                       | <b>Ref#</b> | <b>CAS#</b>  | <b>Qual</b> |
|------------|-----------|--------------|---------------------------------------------------------|-------------|--------------|-------------|
| 1          | 13.672    | 1.59         | 1 Hexadecanoic Acid, Methyl Ester                       | 119400      | 000112-39-0  | 99          |
| 2          | 14.658    | 0.98         | 13-Hexyloxacyclotridec-10-en-2-one                      | 127655      | 127062-51-5  | 95          |
| 3          | 14.772    | 5.66         | 9,12-octadecadienoic Acid, Methyl ester                 | 139708      | 002462-85-3  | 99          |
| 4          | 14.811    | 4.74         | 9- Octadecenoic acid, Methyl ester(E)-                  | 141310      | 001937-62-8  | 99          |
| 5          | 14.842    | 0.51         | 11-Eicosanoic acid, Methyl ester                        | 141291      | 052380-33-3  | 99          |
| 6          | 14.963    | 1.62         | Methyl Stearate                                         | 143126      | 000112-61-8  | 99          |
| 7          | 16.000    | 76.30        | 9-Octadecnoic acid, 12-hydroxy-, Methyl ester, [R-(Z)]- | 154825      | 000141-24-2  | 94          |
| 8          | 16.948    | 0.21         | Butyl 9,12-octadecadienoate                             | 174149      | 1000336-54-1 | 99          |
| 9          | 16.974    | 0.41         | 7-pentadecyne                                           | 67945       | 022089-890   | 86          |
| 10         | 18.081    | 2.23         | 10-undecenoyl chloride                                  | 62430       | 038460-95-6  | 64          |
| 11         | 18.106    | 4.98         | 2-Methyl-Z, Z-3,13-octadecadienol                       | 127747      | 1000130-90-5 | 93          |
| 12         | 18.672    | 0.42         | Squalene                                                | 215927      | 000111-02-4  | 95          |
|            | Total     | 99.65        |                                                         |             |              |             |
